# Supplementary material for: Response of Methanogens in Arctic Sediments to Temperature and Methanogenic Substrate Availability
Source: PubMed Central journal article supplement (PMC4471053; doi:10.1371/journal.pone.0129733), 2015-06-17
Supplement: pone.0129733.s001.pdf [file pone.0129733.s001.pdf]

**Table S1. ARDRA based OTU classification.**

| Sample                               | # clones in library | ARDRA-based OTU (number of clones) |       |       |                            |                           |                         |       |                                            | # clones sequenced |
|--------------------------------------|---------------------|------------------------------------|-------|-------|----------------------------|---------------------------|-------------------------|-------|--------------------------------------------|--------------------|
|                                      |                     | <i>Methanoregulaceae</i>           |       |       | <i>Methanospirillaceae</i> | <i>Methanosarcinaceae</i> | <i>Methanosaetaceae</i> |       | <i>Candidatus</i><br>'Methanoflorentaceae' |                    |
|                                      |                     | OTU 1                              | OTU 2 | OTU 3 | OTU 4                      | OTU 5                     | OTU 6                   | OTU 7 | OTU 8                                      |                    |
| Sediment                             | 89                  | 5                                  | 9     | 4     | 0                          | 8                         | 34                      | 25    | 4                                          | 22                 |
| Unamended 5°C                        | 87                  | 2                                  | 42    | 4     | 8                          | 12                        | 8                       | 11    | 0                                          | 22                 |
| Acetate 5°C                          | 82                  | 5                                  | 43    | 5     | 4                          | 4                         | 9                       | 12    | 0                                          | 16                 |
| H <sub>2</sub> /CO <sub>2</sub> 5°C  | 81*                 | 2                                  | 41    | 0     | 3                          | 5                         | 14                      | 15    | 1                                          | 16                 |
| Acetate 30°C                         | 60                  | 2                                  | 3     | 1     | 2                          | 28                        | 2                       | 22    | 0                                          | 16                 |
| H <sub>2</sub> /CO <sub>2</sub> 30°C | 90                  | 2                                  | 45    | 0     | 0                          | 30                        | 3                       | 10    | 0                                          | 17                 |
